# Supplementary material for: Systematic tissue-specific functional annotation of the human genome highlights immune-related DNA elements for late-onset Alzheimer’s disease
Source: PubMed Central journal article supplement (PMC5546707; doi:10.1371/journal.pgen.1006933), 2017-07-24
Supplement: pgen.1006933.s007.pdf [file pgen.1006933.s007.pdf]

**S3 Table. Details of 45 genome-wide association studies.**

| Trait                                    | Abbr. | Category            | Sample Size* | Ref. | URL                                                                                                                                       |
|------------------------------------------|-------|---------------------|--------------|------|-------------------------------------------------------------------------------------------------------------------------------------------|
| Age at Menarche                          | AAM   | Reproductive        | 132,989      | [1]  | <a href="http://www.reprogen.org/data_download.html">http://www.reprogen.org/data_download.html</a>                                       |
| Age at Natural Menopause                 | AANM  | Reproductive        | 69,360       | [2]  | <a href="http://www.reprogen.org/data_download.html">http://www.reprogen.org/data_download.html</a>                                       |
| Asthma                                   | AST   | Immune/Pulmonary    | 26,475       | [3]  | <a href="http://www.cng.fr/gabriel/index.html">http://www.cng.fr/gabriel/index.html</a>                                                   |
| Eczema                                   | ECZ   | Immune              | 40,835       | [4]  | <a href="http://data.bris.ac.uk/data/dataset/28uchsdpmub118uex26ylacqm">http://data.bris.ac.uk/data/dataset/28uchsdpmub118uex26ylacqm</a> |
| Celiac Disease                           | CEL   | Immune              | 15,283       | [5]  | <a href="https://www.immunobase.org">https://www.immunobase.org</a>                                                                       |
| Crohn's Disease                          | CD    | Immune/IBD          | 21,389       | [6]  | <a href="http://www.ibdgenetics.org">http://www.ibdgenetics.org</a>                                                                       |
| Ulcerative Colitis                       | UC    | Immune/IBD          | 26,405       | [7]  | <a href="http://www.ibdgenetics.org">http://www.ibdgenetics.org</a>                                                                       |
| Primary Biliary Cirrhosis                | PBC   | Immune              | 13,239       | [8]  | <a href="https://www.immunobase.org">https://www.immunobase.org</a>                                                                       |
| Rheumatoid Arthritis                     | RA    | Immune              | 58,284       | [9]  | <a href="http://plaza.umin.ac.jp/~yokada/datasource/software.htm">http://plaza.umin.ac.jp/~yokada/datasource/software.htm</a>             |
| Systemic Lupus Erythematosus             | SLE   | Immune              | 14,267       | [10] | <a href="https://www.immunobase.org">https://www.immunobase.org</a>                                                                       |
| Multiple Sclerosis                       | MS    | Immune/Neurological | 27,148       | [11] | <a href="https://www.immunobase.org">https://www.immunobase.org</a>                                                                       |
| Epilepsy                                 | EPL   | Neurological        | 34,853       | [12] | <a href="http://www.epigad.org/page/show/homepage">http://www.epigad.org/page/show/homepage</a>                                           |
| Chronotype                               | CHT   | Social/Psychiatric  | 127,898      | [13] | <a href="http://www.t2diabetesgenes.org/data/">http://www.t2diabetesgenes.org/data/</a>                                                   |
| Subjective Well-being                    | SWB   | Social/Psychiatric  | 298,420      | [14] | <a href="http://www.thessgac.org/#!data/kuzq8">http://www.thessgac.org/#!data/kuzq8</a>                                                   |
| Depressive Symptoms                      | DEP   | Social/Psychiatric  | 161,460      | [14] | <a href="http://www.thessgac.org/#!data/kuzq8">http://www.thessgac.org/#!data/kuzq8</a>                                                   |
| Neuroticism                              | NEU   | Social/Psychiatric  | 170,911      | [14] | <a href="http://www.thessgac.org/#!data/kuzq8">http://www.thessgac.org/#!data/kuzq8</a>                                                   |
| Cognitive Performance                    | IQ    | Neurological        | 106,736      | [15] | <a href="http://www.thessgac.org/#!data/kuzq8">http://www.thessgac.org/#!data/kuzq8</a>                                                   |
| Education Years                          | EDU   | Social              | 293,723      | [16] | <a href="http://www.thessgac.org/#!data/kuzq8">http://www.thessgac.org/#!data/kuzq8</a>                                                   |
| Schizophrenia                            | SCZ   | Psychiatric         | 82,315       | [17] | <a href="https://www.med.unc.edu/pgc/results-and-downloads">https://www.med.unc.edu/pgc/results-and-downloads</a>                         |
| Bipolar Disorder                         | BD    | Psychiatric         | 16,731       | [18] | <a href="https://www.med.unc.edu/pgc/results-and-downloads">https://www.med.unc.edu/pgc/results-and-downloads</a>                         |
| Major Depressive Disorder                | MDD   | Psychiatric         | 18,759       | [19] | <a href="https://www.med.unc.edu/pgc/results-and-downloads">https://www.med.unc.edu/pgc/results-and-downloads</a>                         |
| Attention-Deficit/Hyperactivity Disorder | ADHD  | Psychiatric         | 9,543        | [20] | <a href="https://www.med.unc.edu/pgc/results-and-downloads">https://www.med.unc.edu/pgc/results-and-downloads</a>                         |
| Anorexia Nervosa                         | AN    | Psychiatric         | 14,477       | [21] | <a href="https://www.med.unc.edu/pgc/results-and-downloads">https://www.med.unc.edu/pgc/results-and-downloads</a>                         |
| Anxiety                                  | ANX   | Psychiatric         | 18,186       | [22] | <a href="https://www.med.unc.edu/pgc/results-and-downloads">https://www.med.unc.edu/pgc/results-and-downloads</a>                         |
| Ever Smoker                              | SMK   | Psychiatric         | 74,053       | [23] | <a href="https://www.med.unc.edu/pgc/results-and-downloads">https://www.med.unc.edu/pgc/results-and-downloads</a>                         |
| Body Mass Index                          | BMI   | Anthropometric      | 234,069      | [24] | <a href="http://www.broadinstitute.org/collaboration/giant/index.php">http://www.broadinstitute.org/collaboration/giant/index.php</a>     |
| Height                                   | HT    | Anthropometric      | 253,288      | [25] | <a href="http://www.broadinstitute.org/collaboration/giant/index.php">http://www.broadinstitute.org/collaboration/giant/index.php</a>     |
| Waist-hip Ratio (adjusted for BMI)       | WHR   | Anthropometric      | 142,762      | [26] | <a href="http://www.broadinstitute.org/collaboration/giant/index.php">http://www.broadinstitute.org/collaboration/giant/index.php</a>     |
| Systolic Blood Pressure                  | SBP   | Cardiovascular      | 69,909       | [27] | dbGap accession phs000585.v2.p1                                                                                                           |
| Diastolic Blood Pressure                 | DBP   | Cardiovascular      | 69,899       | [27] | dbGap accession phs000585.v2.p1                                                                                                           |
| Pulse Pressure                           | PP    | Cardiovascular      | 74,079       | [27] | dbGap accession phs000585.v2.p1                                                                                                           |
| Birth Weight                             | BW    | Growth              | 143,677      | [28] | <a href="http://egg-consortium.org/birth-weight-2016.html">http://egg-consortium.org/birth-weight-2016.html</a>                           |
| Fasting Glucose                          | GLU   | Metabolic           | 58,074       | [29] | <a href="http://www.magicinvestigators.org/downloads/">http://www.magicinvestigators.org/downloads/</a>                                   |
| Fasting Insulin                          | INS   | Metabolic           | 51,750       | [29] | <a href="http://www.magicinvestigators.org/downloads/">http://www.magicinvestigators.org/downloads/</a>                                   |
| Hemoglobin A1C                           | HBA   | Metabolic           | 46,368       | [30] | <a href="http://www.magicinvestigators.org/downloads/">http://www.magicinvestigators.org/downloads/</a>                                   |
| High Density Lipoprotein                 | HDL   | Metabolic           | 99,900       | [31] | <a href="http://csg.sph.umich.edu/abecasis/public/lipids2010/">http://csg.sph.umich.edu/abecasis/public/lipids2010/</a>                   |
| Low Density Lipoprotein                  | LDL   | Metabolic           | 95,454       | [31] | <a href="http://csg.sph.umich.edu/abecasis/public/lipids2010/">http://csg.sph.umich.edu/abecasis/public/lipids2010/</a>                   |
| Total Cholesterol                        | TC    | Metabolic           | 100,184      | [31] | <a href="http://csg.sph.umich.edu/abecasis/public/lipids2010/">http://csg.sph.umich.edu/abecasis/public/lipids2010/</a>                   |
| Triglyceride                             | TG    | Metabolic           | 96,598       | [31] | <a href="http://csg.sph.umich.edu/abecasis/public/lipids2010/">http://csg.sph.umich.edu/abecasis/public/lipids2010/</a>                   |
| Coronary Artery Disease                  | CAD   | Cardiovascular      | 184,305      | [32] | <a href="http://www.cardiogramplusc4d.org/downloads/">http://www.cardiogramplusc4d.org/downloads/</a>                                     |
| Type-II Diabetes                         | T2D   | Metabolic           | 110,452      | [33] | <a href="http://diagram-consortium.org/downloads.html">http://diagram-consortium.org/downloads.html</a>                                   |
| Age-related Macular Degeneration         | AMD   | Eye                 | 33,976       | [34] | <a href="http://csg.sph.umich.edu/abecasis/public/amd2015/">http://csg.sph.umich.edu/abecasis/public/amd2015/</a>                         |
| Primary Angle Closure Glaucoma           | PACG  | Eye                 | 26,454       | [35] | Journal supplementary material                                                                                                            |
| Femoral Neck Bone Mineral Density        | FNBM  | Bone                | 32,961       | [36] | <a href="http://www.gefos.org/?q=content/data-release-2012">http://www.gefos.org/?q=content/data-release-2012</a>                         |
| Lumbar Spine Bone Mineral Density        | LSBMD | Bone                | 31,800       | [36] | <a href="http://www.gefos.org/?q=content/data-release-2012">http://www.gefos.org/?q=content/data-release-2012</a>                         |

\* Sample size may be slightly different from that reported in the reference due to technical reasons (e.g. inconsistencies between data sources, different sample sizes for secondary phenotypes).

1. Perry, J.R., et al., *Parent-of-origin-specific allelic associations among 106 genomic loci for age at menarche*. Nature, 2014. **514**(7520): p. 92-7.
2. Day, F.R., et al., *Large-scale genomic analyses link reproductive aging to hypothalamic signaling, breast cancer susceptibility and BRCA1-mediated DNA repair*. Nat Genet, 2015. **47**(11): p. 1294-303.
3. Moffatt, M.F., et al., *A large-scale, consortium-based genomewide association study of asthma*. N Engl J Med, 2010. **363**(13): p. 1211-21.
4. Paternoster, L., et al., *Multi-ancestry genome-wide association study of 21,000 cases and 95,000 controls identifies new risk loci for atopic dermatitis*. Nat Genet, 2015. **47**(12): p. 1449-56.
5. Dubois, P.C., et al., *Multiple common variants for celiac disease influencing immune gene expression*. Nat Genet, 2010. **42**(4): p. 295-302.
6. Franke, A., et al., *Genome-wide meta-analysis increases to 71 the number of confirmed Crohn's disease susceptibility loci*. Nat Genet, 2010. **42**(12): p. 1118-25.
7. Anderson, C.A., et al., *Meta-analysis identifies 29 additional ulcerative colitis risk loci, increasing the number of confirmed associations to 47*. Nat Genet, 2011. **43**(3): p. 246-52.
8. Cordell, H.J., et al., *International genome-wide meta-analysis identifies new primary biliary cirrhosis risk loci and targetable pathogenic pathways*. Nat Commun, 2015. **6**: p. 8019.
9. Okada, Y., et al., *Genetics of rheumatoid arthritis contributes to biology and drug discovery*. Nature, 2014. **506**(7488): p. 376-81.
10. Bentham, J., et al., *Genetic association analyses implicate aberrant regulation of innate and adaptive immunity genes in the pathogenesis of systemic lupus erythematosus*. Nature genetics, 2015.
11. Sawcer, S., et al., *Genetic risk and a primary role for cell-mediated immune mechanisms in multiple sclerosis*. Nature, 2011. **476**(7359): p. 214-9.
12. Consortium, T.I.L.A.E., *Genetic determinants of common epilepsies: a meta-analysis of genome-wide association studies*. The Lancet. Neurology, 2014. **13**(9): p. 893.
13. Jones, S.E., et al., *Genome-wide association analyses in 128,266 individuals identifies new morningness and sleep duration loci*. PLoS Genet, 2016. **12**(8): p. e1006125.
14. Okbay, A., et al., *Genetic variants associated with subjective well-being, depressive symptoms, and neuroticism identified through genome-wide analyses*. Nature genetics, 2016.
15. Rietveld, C.A., et al., *Common genetic variants associated with cognitive performance identified using the proxy-phenotype method*. Proceedings of the National Academy of Sciences, 2014. **111**(38): p. 13790-13794.
16. Okbay, A., et al., *Genome-wide association study identifies 74 loci associated with educational attainment*. Nature, 2016. **533**(7604): p. 539-42.
17. Ripke, S., et al., *Biological insights from 108 schizophrenia-associated genetic loci*. Nature, 2014. **511**(7510): p. 421.
18. Group, P.G.C.B.D.W., *Large-scale genome-wide association analysis of bipolar disorder identifies a new susceptibility locus near ODZ4*. Nature genetics, 2011. **43**(10): p. 977-983.
19. Ripke, S., et al., *A mega-analysis of genome-wide association studies for major depressive disorder*. Mol Psychiatry, 2013. **18**(4): p. 497-511.

20. Neale, B.M., et al., *Meta-analysis of genome-wide association studies of attention-deficit/hyperactivity disorder*. J Am Acad Child Adolesc Psychiatry, 2010. **49**(9): p. 884-97.
21. Boraska, V., et al., *A genome-wide association study of anorexia nervosa*. Mol Psychiatry, 2014. **19**(10): p. 1085-94.
22. Otowa, T., et al., *Meta-analysis of genome-wide association studies of anxiety disorders*. Molecular psychiatry, 2016.
23. Tobacco and G. Consortium, *Genome-wide meta-analyses identify multiple loci associated with smoking behavior*. Nature genetics, 2010. **42**(5): p. 441-447.
24. Locke, A.E., et al., *Genetic studies of body mass index yield new insights for obesity biology*. Nature, 2015. **518**(7538): p. 197-206.
25. Wood, A.R., et al., *Defining the role of common variation in the genomic and biological architecture of adult human height*. Nat Genet, 2014. **46**(11): p. 1173-86.
26. Shungin, D., et al., *New genetic loci link adipose and insulin biology to body fat distribution*. Nature, 2015. **518**(7538): p. 187-96.
27. Ehret, G.B., et al., *The genetics of blood pressure regulation and its target organs from association studies in 342,415 individuals*. Nat Genet, 2016. **advance online publication**.
28. Horikoshi, M., et al., *Genome-wide associations for birth weight and correlations with adult disease*. Nature, 2016. **advance online publication**.
29. Manning, A.K., et al., *A genome-wide approach accounting for body mass index identifies genetic variants influencing fasting glycaemic traits and insulin resistance*. Nature genetics, 2012. **44**(6): p. 659-669.
30. Soranzo, N., et al., *Common variants at 10 genomic loci influence hemoglobin A1C levels via glycaemic and nonglycaemic pathways*. Diabetes, 2010. **59**(12): p. 3229-3239.
31. Teslovich, T.M., et al., *Biological, clinical and population relevance of 95 loci for blood lipids*. Nature, 2010. **466**(7307): p. 707-713.
32. Consortium, C.D., *A comprehensive 1000 Genomes-based genome-wide association meta-analysis of coronary artery disease*. Nature genetics, 2015.
33. Consortium, D.S.D., et al., *Genome-wide trans-ancestry meta-analysis provides insight into the genetic architecture of type 2 diabetes susceptibility*. Nature genetics, 2014. **46**(3): p. 234-244.
34. Fritsche, L.G., et al., *A large genome-wide association study of age-related macular degeneration highlights contributions of rare and common variants*. Nature genetics, 2016. **48**(2): p. 134-143.
35. Khor, C.C., et al., *Genome-wide association study identifies five new susceptibility loci for primary angle closure glaucoma*. Nature genetics, 2016. **48**(5): p. 556-562.
36. Estrada, K., et al., *Genome-wide meta-analysis identifies 56 bone mineral density loci and reveals 14 loci associated with risk of fracture*. Nature genetics, 2012. **44**(5): p. 491-501.
