# Supplementary material for: Systematic tissue-specific functional annotation of the human genome highlights immune-related DNA elements for late-onset Alzheimer’s disease
Source: PubMed Central journal article supplement (PMC5546707; doi:10.1371/journal.pgen.1006933), 2017-07-24
Supplement: pgen.1006933.s013.pdf [file pgen.1006933.s013.pdf]

**S8 Table. Candidate loci for pleiotropic effect between AD and PD.**

| <b>Chr</b> | <b>Start</b> | <b>End</b>  | <b>Gene*</b>    | <b>Ref. **</b>                        |
|------------|--------------|-------------|-----------------|---------------------------------------|
| 1          | 89,400,000   | 89,800,000  | <i>GBP1</i>     |                                       |
| 3          | 71,600,000   | 72,000,000  | <i>PROK2</i>    | [1]                                   |
| 3          | 143,400,000  | 143,800,000 | <i>SLC9A9</i>   | [2-7]                                 |
| 4          | 77,000,000   | 77,400,000  | <i>CCDC158</i>  | [8]                                   |
| 5          | 10,400,000   | 10,800,000  | <i>ANKRD33B</i> | [9]                                   |
| 5          | 139,400,000  | 139,800,000 | <i>HBEGF</i>    | [10, 11]                              |
| 6          | 27,000,000   | 27,400,000  | <i>PRSS16</i>   | [12]                                  |
| 6          | 31,000,000   | 31,400,000  | <i>HLA-B</i>    | Well studied immune-associated region |
| 6          | 32,300,000   | 32,700,000  | <i>HLA-DQB1</i> | Well studied immune-associated region |
| 6          | 106,800,000  | 107,200,000 | <i>AIM1</i>     | [13-16]                               |
| 9          | 79,000,000   | 79,400,000  | <i>PRUNE2</i>   | [17, 18]                              |
| 16         | 200,000      | 600,000     | <i>AXIN1</i>    | [19]                                  |
| 16         | 30,800,000   | 31,400,000  | <i>PRSS8</i>    | [8]                                   |
| 17         | 43,600,000   | 44,400,000  | <i>MAPT</i>     | [8, 10, 20]                           |
| 19         | 52,200,000   | 52,600,000  | <i>ZNF649</i>   | [21]                                  |

\* Each locus may contain multiple genes.

\*\* References for reported associations with neurodegenerative diseases or other related traits.

1. Severini, C., et al., *Bv8/prokineticin 2 is involved in A $\beta$ -induced neurotoxicity*. Scientific reports, 2015. **5**.
2. Martinelli-Boneschi, F., et al., *Pharmacogenomics in Alzheimer's disease: a genome-wide association study of response to cholinesterase inhibitors*. Neurobiology of aging, 2013. **34**(6): p. 1711. e7-1711. e13.
3. Esposito, F., et al., *A pharmacogenetic study implicates SLC9a9 in multiple sclerosis disease activity*. Annals of neurology, 2015. **78**(1): p. 115-127.
4. Turner, S.T., et al., *Genomic association analysis identifies multiple loci influencing antihypertensive response to an angiotensin II receptor blocker*. Hypertension, 2012. **59**(6): p. 1204-1211.
5. Mick, E., et al., *Family-based genome-wide association scan of attention-deficit/hyperactivity disorder*. Journal of the American Academy of Child & Adolescent Psychiatry, 2010. **49**(9): p. 898-905. e3.
6. Kondapalli, K.C., et al., *Functional evaluation of autism-associated mutations in NHE9*. Nature communications, 2013. **4**.
7. Chalasani, N., et al., *Genome-wide association study identifies variants associated with histologic features of nonalcoholic fatty liver disease*. Gastroenterology, 2010. **139**(5): p. 1567-1576. e6.
8. Nalls, M.A., et al., *Large-scale meta-analysis of genome-wide association data identifies six new risk loci for Parkinson's disease*. Nature genetics, 2014. **46**(9): p. 989-993.
9. Liu, J.Z., et al., *Association analyses identify 38 susceptibility loci for inflammatory bowel disease and highlight shared genetic risk across populations*. Nature genetics, 2015. **47**(9): p. 979-986.
10. Jun, G., et al., *A novel Alzheimer disease locus located near the gene encoding tau protein*. Molecular psychiatry, 2015.
11. Ashok, A., et al., *Chronic cerebral hypoperfusion-induced impairment of A $\beta$  clearance requires HB-EGF-dependent sequential activation of HIF1 $\alpha$  and MMP9*. Neurobiology of Disease, 2016. **95**: p. 179-193.
12. Purcell, S.M., et al., *Common polygenic variation contributes to risk of schizophrenia and bipolar disorder*. Nature, 2009. **460**(7256): p. 748-752.
13. Matarín, M., et al., *A genome-wide genotyping study in patients with ischaemic stroke: initial analysis and data release*. The Lancet Neurology, 2007. **6**(5): p. 414-420.
14. Yashin, A.I., et al., *Joint influence of small-effect genetic variants on human longevity*. Aging, 2010. **2**(9): p. 612-620.
15. Okada, Y., et al., *Genetics of rheumatoid arthritis contributes to biology and drug discovery*. Nature, 2014. **506**(7488): p. 376-81.
16. Martin, J.-E., et al., *A systemic sclerosis and systemic lupus erythematosus pan-meta-GWAS reveals new shared susceptibility loci*. Human molecular genetics, 2013. **22**(19): p. 4021-4029.
17. Hart, A.B., et al., *Genome-wide association study of d-amphetamine response in healthy volunteers identifies putative associations, including cadherin 13 (CDH13)*. PloS one, 2012. **7**(8): p. e42646.
18. Potkin, S.G., et al., *Hippocampal atrophy as a quantitative trait in a genome-wide association study identifying novel susceptibility genes for Alzheimer's disease*. PloS one, 2009. **4**(8): p. e6501.

19. Stoothoff, W.H., et al., *Axin negatively affects tau phosphorylation by glycogen synthase kinase 3 $\beta$* . Journal of neurochemistry, 2002. **83**(4): p. 904-913.
20. Lei, P., et al., *Tau protein: relevance to Parkinson's disease*. The international journal of biochemistry & cell biology, 2010. **42**(11): p. 1775-1778.
21. Winham, S., et al., *Genome-wide association study of bipolar disorder accounting for effect of body mass index identifies a new risk allele in TCF7L2*. Molecular psychiatry, 2014. **19**(9): p. 1010-1016.
