# Supplementary material for: Systematic tissue-specific functional annotation of the human genome highlights immune-related DNA elements for late-onset Alzheimer’s disease
Source: PLoS Genet. 2017 Jul 24;13(7):e1006933. doi: 10.1371/journal.pgen.1006933 (PMC5546707; doi:10.1371/journal.pgen.1006933)
Supplement: S6 Table — (XLSX) [file pgen.1006933.s010.xlsx]

## Sheet: Sheet1
	AAM	AANM	AST	ECZ	CEL	CD	UC	PBC	RA	SLE	MS	EPL	CHT	SWB	DEP	NEU	IQ	EDU	SCZ	BIP	MDD	ADHD	AN	ANX	SMK	BMI	HT	WHR	SBP	DBP	PP	BW	GLU	INS	HBA	HDL	LDL	TC	TG	CAD	T2D	AMD	PACG	FNBMD	LSBMD
Mononuclear cells from peripheral blood	2.80701e-06	0.0437965	0.142658	0.179634	0.0053852	0.188843	0.640257	0.021171	0.613029	0.00456175	0.00592993	0.939796	0.495206	0.483306	0.0909276	0.723792	0.0163478	9.67247e-05	0.00317663	0.0236883	0.488079	0.331682	0.4343	0.00502561	0.126918	0.000203294	1.11126e-06	0.125389	0.00248907	0.0661643	0.00497241	0.242667	0.887064	0.046778	0.164399	0.0226438	0.230724	0.298452	0.146372	0.326242	0.453362	0.213643	0.00727213	0.0699404	0.0127661
T cells CD3+	0.0295134	0.313561	0.616047	0.183402	0.142022	0.00157382	0.0481092	0.999109	0.00457376	0.0294227	0.00881443	0.757461	0.890936	0.751539	0.294441	0.556773	0.74669	0.0206377	2.91502e-05	0.160089	0.3478	0.208152	0.750666	0.0631605	0.121364	0.0482252	3.97946e-06	0.20001	0.00236618	0.180684	0.0314189	0.00535849	0.126113	0.205007	0.793086	0.240762	0.000907649	0.00308847	0.031757	0.0125422	0.675023	0.00301943	0.0612892	0.0345635	0.00743955
T cells effector/memory CD4+ CD25int CD127+	0.00170201	0.355447	0.122128	0.212242	0.0387545	0.00270456	0.0195273	0.357397	0.00282262	0.0631857	0.0021396	0.142165	0.492368	0.857361	0.637351	0.676152	0.00483782	0.0101148	0.00696973	0.0669274	0.929088	0.159048	0.188682	0.04551	0.788808	0.521065	1.07872e-08	0.0132907	0.000116071	0.0130683	5.58049e-05	0.000545525	0.386714	0.0577291	0.422592	0.00645766	0.0161955	0.065985	0.0569908	0.00718805	0.868237	0.00848994	0.000649846	0.105808	0.183179
T regulatory cells CD4+ CD25+ CD127-	0.0099383	0.0748457	0.0271106	0.906835	0.296891	0.0141834	0.0361076	0.0508705	0.000802407	0.0144149	0.000913492	0.035476	0.912737	0.65753	0.157353	0.159481	0.0166705	0.0260944	0.000363126	0.149527	0.78531	0.712999	0.379767	0.308797	0.346443	0.184444	3.82471e-11	0.00166071	0.00400228	0.00713455	0.223731	0.000650104	0.136997	0.148968	0.304908	0.00397397	0.0213356	0.0567592	0.0104941	0.00327807	0.893234	0.00504234	0.0033378	0.316616	0.662151
T helper cells CD4+ CD25-	0.0223477	0.181022	0.37573	0.186062	0.955134	0.0981885	0.39335	0.483331	0.585115	0.0334492	0.973984	0.31645	0.872806	0.859779	0.68762	0.253452	0.0036146	0.0106284	0.00162171	0.0696714	0.3629	0.146596	0.504413	0.32863	0.766589	0.60309	5.44127e-11	1.33215e-05	0.0276575	0.00173548	0.000594004	0.000291371	0.66593	0.235718	0.527411	2.58249e-05	0.0163117	0.0880355	0.129526	0.0208369	0.969491	0.00299992	0.00986515	0.063224	0.0396317
T helper naive cells CD4+ CD25- CD45RA+	8.40043e-06	0.119483	0.140623	0.783603	0.169029	0.0165355	0.193514	0.253067	0.00806028	0.0223073	0.00290648	0.0525361	0.584806	0.776104	0.188118	0.774786	0.538273	0.0627656	0.00013434	0.0506033	0.342535	0.486683	0.404391	0.511013	0.986566	0.00922186	3.02333e-09	0.000982409	0.00241952	0.0418683	0.0475258	0.00463869	0.228274	0.452109	0.563747	0.0508548	0.0989998	0.174544	0.251618	0.0111992	0.159669	0.108797	0.046438	0.489141	0.764933
T helper cells PMA-I stimulated CD4+ CD25- IL17-	0.00100737	0.126948	0.0132158	0.0235573	4.49742e-06	0.00101304	0.00193099	0.00516285	0.000141902	0.000784411	7.35523e-07	0.868264	0.689034	0.711869	0.342356	0.184161	0.00543397	0.00061454	0.000142864	0.376203	0.864384	0.663544	0.425444	0.260208	0.134434	0.483522	8.87409e-08	0.0448055	7.26626e-05	0.00920904	0.0064762	5.71542e-06	0.633187	0.0919422	0.28476	0.00644486	0.0132923	0.0514575	0.00986599	0.00889656	0.911718	0.0347068	0.050497	0.054917	0.371854
T helper 17 cells PMA-I stimulated CD4+ CD25- IL17+	0.000133713	0.685507	0.0164222	0.00163363	0.000305347	0.000125611	0.00246114	0.00452378	9.04853e-05	0.011312	0.000526127	0.219345	0.352809	0.641073	0.362382	0.464838	0.949017	0.0298619	0.0300062	0.317068	0.918052	0.421516	0.81392	0.16019	0.670271	0.0220306	1.42626e-05	0.000206669	0.0167842	0.0263389	0.0409842	0.00888391	0.860462	0.577314	0.493058	0.0283236	0.236295	0.394521	0.0110448	0.0127909	0.936625	0.268613	0.00923198	0.237502	0.245246
T helper memory cells CD4+ CD25- CD45RO+	0.00434271	0.918869	0.055487	0.0299353	0.00258974	0.0176456	0.0260601	0.0317447	0.000197779	0.000552378	0.000177129	0.309136	0.387186	0.199689	0.382108	0.758038	0.0937853	0.0168932	0.0122559	0.116576	0.907548	0.494121	0.504606	0.0848066	0.628035	0.393185	1.74891e-12	0.000296297	0.000272256	0.00361208	0.000590039	7.08574e-05	0.725174	0.22888	0.742959	0.00475226	0.0101028	0.0218632	0.0379797	0.0018118	0.557111	0.0397336	0.00770328	0.0587499	0.218704
T helper memory cells from peripheral blood CD4+	0.0164145	0.481539	0.0545094	0.256676	0.0267742	0.00674428	0.0615579	0.0906577	0.00313877	0.00117243	0.0107178	0.377962	0.138123	0.652453	0.397885	0.320202	0.0589245	0.0715433	0.0228388	0.168291	0.435843	0.482211	0.156205	0.0196037	0.753879	0.67404	1.0499e-06	0.00076624	0.000101799	0.00188478	9.70163e-05	0.000261941	0.783198	0.0726317	0.309923	0.000884042	0.00774565	0.016584	0.0764163	0.00404136	0.834565	0.0317342	0.00241334	0.108109	0.14128
T memory cells CD8+	0.0125712	0.679209	0.0341489	0.317352	0.0558045	0.0482218	0.0900008	0.314151	0.0308679	0.00312242	0.0132657	0.223433	0.676324	0.394625	0.6443	0.794212	0.206438	0.117316	0.00346529	0.180617	0.737979	0.43036	0.441891	0.0170176	0.993471	0.617678	1.62298e-07	0.00469793	5.37414e-05	0.00269842	0.000468447	0.000585886	0.974509	0.0908303	0.602919	0.00012701	0.0379931	0.043106	0.015516	0.0165536	0.717286	0.0348802	0.00194577	0.258824	0.960236
T helper naive cells CD4+	0.00942702	0.661935	0.060251	0.207079	0.00722189	0.055987	0.0820553	0.245199	0.016243	0.0171944	0.00129039	0.883736	0.387347	0.41643	0.503074	0.455937	0.0327033	0.11271	0.107381	0.0795457	0.958004	0.733208	0.675792	0.0936934	0.186584	0.134263	2.63037e-08	0.00516366	0.00144055	0.0143217	0.00114416	0.00526836	0.594908	0.23409	0.117765	0.00365709	0.131078	0.124234	0.029756	0.00818146	0.842677	0.0302317	0.000934974	0.16163	0.392136
T naive cells CD8+	0.0228779	0.835915	0.823	0.246512	0.35494	0.310677	0.228688	0.41756	0.0686854	0.309156	0.0195663	0.538679	0.2976	0.244301	0.900435	0.943478	0.698085	0.659895	0.0262725	0.141404	0.347516	0.769874	0.724266	0.0302507	0.738746	0.949481	2.10962e-07	0.00222689	1.49269e-05	0.00855862	5.78917e-05	0.0144811	0.325522	0.0946586	0.756911	0.00199767	0.00402281	0.00670876	0.0997012	0.0113241	0.384047	0.123489	0.00286361	0.0150454	0.639407
Monocytes CD14+	4.58192e-05	0.00014869	0.255821	0.103031	0.000512959	2.90657e-11	0.00358393	0.000604913	0.000160378	0.000693211	4.71669e-05	0.412735	0.0454609	0.1766	0.00182939	0.215983	0.00638014	5.98455e-06	0.000992701	7.82447e-05	0.104387	0.629307	0.907917	0.19175	0.288614	2.91231e-05	3.62623e-09	1.72729e-08	0.000866147	0.00547714	0.00410936	1.629e-07	0.0736299	0.0170152	0.0582658	2.6655e-07	7.39151e-06	3.12412e-05	6.83388e-08	1.54153e-05	0.105974	0.000997381	0.163822	0.132603	0.44049
Hematopoietic stem cells G-CSF-mobilized CD34+	5.62344e-06	0.105254	0.0663562	0.322219	0.0857035	0.0088422	0.0745005	0.0555599	0.0846648	0.00155944	0.0131768	0.811627	0.395537	0.802532	0.0068737	0.049192	9.57348e-05	1.0866e-05	0.000518991	0.0248824	0.414589	0.525904	0.861781	0.213683	0.318915	2.95746e-07	8.38816e-11	2.27679e-05	0.000233434	0.00321075	0.000150233	6.76954e-06	0.196168	0.0376529	0.102345	0.0165952	0.0670853	0.17412	0.00829509	0.0138037	0.0972108	4.06771e-05	0.0180532	0.0266082	0.0546035
B cells CD19+	8.73322e-06	0.078812	0.0180906	0.471063	0.000346522	6.56113e-05	0.00986074	2.27146e-06	1.01891e-05	3.99438e-05	2.24384e-06	0.816724	0.0112874	0.264701	0.270896	0.40425	0.0303373	0.00247211	0.000542132	0.0595182	0.682343	0.298885	0.722414	0.323449	0.592817	0.00172129	8.02969e-06	0.0983602	4.47707e-05	0.00290333	0.00391407	0.00760474	0.970149	0.146467	0.776882	0.0388343	0.00248645	0.0155537	0.0109747	0.00447115	0.296133	0.00707248	0.12803	0.0228845	0.106612
Natural killer cells CD56+	7.63401e-05	0.965712	0.0114858	0.215955	0.0137259	2.85944e-06	0.0101258	0.00570238	0.00029237	0.000287533	9.46168e-05	0.980389	0.111251	0.905665	0.201163	0.617451	0.00063499	0.00187439	0.0768774	0.457281	0.0938153	0.911062	0.890191	0.650791	0.541193	0.000903983	5.45481e-07	0.285243	0.039756	0.118604	0.124078	0.0147276	0.894569	0.740191	0.725581	0.0681016	0.0700536	0.155356	0.117652	0.0019763	0.744208	0.000402986	0.282143	0.758087	0.0684477
GM12878 lymphoblastoid cells	0.00384689	0.0508675	0.1673	0.0531125	0.000203673	0.000157127	0.0746169	5.0343e-06	2.21697e-05	2.05883e-08	1.045e-06	0.0781808	0.560766	0.152916	0.3862	0.994589	0.00802746	0.00148387	0.000469691	0.638605	0.867225	0.368766	0.209331	0.0829065	0.368323	0.596768	3.80033e-05	0.103552	0.0899276	0.396839	0.029375	0.000499363	0.566247	0.403616	0.154906	0.188492	0.0742889	0.261894	0.180436	0.0348662	0.675279	0.00252676	0.245582	0.867577	0.205894
Thymus	0.00013882	0.0995352	0.249215	0.904315	0.351051	0.18285	0.168729	0.575219	0.232613	0.0253918	0.0986086	0.39277	0.621986	0.478465	0.116224	0.428076	0.0255396	0.00136065	0.000332891	0.20657	0.598389	0.367901	0.211253	0.052176	0.577393	0.0242894	1.01906e-10	0.0014248	3.49703e-05	0.00127697	0.000672288	9.10779e-06	0.555868	0.164839	0.659775	0.000311934	0.00949817	0.0207823	0.038702	0.0017806	0.919549	0.0267086	0.00448076	0.0400203	0.190017
Spleen	0.000775637	0.891542	0.165871	0.00385545	0.00425392	0.000572099	0.00555266	0.0567819	0.000520265	0.000847807	3.88513e-07	0.404395	0.0475347	0.912084	0.0255277	0.941726	0.242998	0.00125989	0.00268431	0.00692538	0.567206	0.565284	0.748568	0.0380822	0.55198	0.0644871	1.49171e-07	0.1294	8.36916e-06	0.000194756	0.00140523	3.5214e-05	0.807149	0.0338549	0.0216551	0.111278	0.00308447	0.0657441	0.0534195	7.83275e-06	0.187988	0.000457023	0.000144517	0.0898034	0.166358
Brain hippocampus middle	3.68978e-05	0.370317	0.975473	0.261468	0.0582965	0.0224579	0.339156	0.451775	0.341405	0.691976	0.0903798	0.212017	0.0355223	0.857489	0.025886	0.781064	0.0129049	0.00105278	2.1887e-05	0.381143	0.808219	0.315402	0.647566	0.247749	0.0627463	8.16463e-05	9.05007e-12	0.0358367	0.00234984	0.0137836	0.0103154	0.019091	0.763217	0.0418556	0.141831	0.0355495	0.0281151	0.0599049	0.145203	0.00340991	0.525812	0.0152445	0.0213906	0.337796	0.266038
Brain substantia nigra	0.00010576	0.131879	0.999863	0.376281	0.215008	0.0440786	0.998289	0.0362194	0.0405378	0.00206745	0.0256865	0.974618	0.329908	0.326085	0.0638849	0.545691	0.0549762	0.00149871	0.00366291	0.0953073	0.391711	0.705502	0.883945	0.165462	0.537217	0.00161525	1.5879e-08	0.0106285	0.00764187	0.0117561	0.0194037	0.00135777	0.461089	0.624161	0.0342413	0.0022487	0.0180742	0.0467119	0.0300314	0.0125565	0.5093	0.000502032	0.029667	0.258536	0.0224598
Brain anterior caudate	7.19826e-06	0.424152	0.226603	0.201885	0.594653	0.0268986	0.217141	0.343134	0.426958	0.713042	0.255317	0.0295884	0.000709678	0.0589961	0.0129505	0.000253133	5.82938e-06	5.17345e-10	8.6627e-12	0.000128617	0.368446	0.611922	0.0568598	0.0354985	0.0429364	2.82051e-08	2.38899e-08	0.0588609	1.82953e-05	0.00214112	0.00330976	0.000785704	0.116879	0.152863	0.629468	5.9362e-05	0.0607939	0.0825671	0.0129079	0.000256286	0.28067	0.00387807	0.000311324	0.0221574	0.21452
Brain cingulate gyrus	0.000538869	0.0377752	0.993469	0.821578	0.849213	0.870136	0.223625	0.694225	0.436243	0.0418365	0.515094	0.152723	0.343352	0.0718583	0.236174	0.076741	0.000718024	2.01316e-08	3.97617e-08	0.0142238	0.362586	0.225582	0.8374	0.060347	0.0398719	0.000125742	4.34725e-06	0.676888	0.000137378	0.13649	9.16586e-05	0.170781	0.708997	0.432058	0.966652	0.0559875	0.407915	0.553713	0.942843	0.00609837	0.388367	0.164402	0.000459547	0.384712	0.331661
Brain inferior temporal lobe	3.65346e-05	0.692712	0.324143	0.494824	0.587997	0.212726	0.477128	0.146832	0.00891739	0.0666128	0.048574	0.240557	0.108568	0.32286	0.0586566	0.0723291	0.000360054	1.06242e-06	2.48814e-05	0.11371	0.573923	0.348099	0.689963	0.115897	0.00635897	8.79816e-06	6.66789e-08	0.018809	0.0628233	0.229126	0.0260717	0.0153301	0.334163	0.221685	0.497127	0.0991579	0.350229	0.98291	0.199051	0.00549487	0.685877	0.00350409	0.00168458	0.264288	0.583396
Brain angular gyrus	8.99495e-06	0.0455265	0.0930723	0.317964	0.675979	0.998334	0.735875	0.519526	0.636897	0.341855	0.561219	0.00514969	0.128376	0.036972	0.0977855	0.00990637	9.41813e-05	4.5404e-08	5.9603e-11	0.115753	0.90081	0.56355	0.842873	0.527338	0.3754	0.00177296	1.47862e-05	0.0904456	0.000351304	0.0345091	0.06321	0.0821003	0.319588	0.343671	0.594415	0.219705	0.201337	0.319243	0.0391539	0.089862	0.99069	0.0625111	0.0381114	0.0252809	0.0973269
Brain dorsolateral prefrontal cortex	2.09369e-06	0.400206	0.725645	0.984213	0.326778	0.156631	0.59324	0.296967	0.25133	0.348789	0.274486	0.535423	0.00884271	0.010545	0.006284	0.00150187	0.00014283	2.90784e-08	4.25139e-10	0.0359746	0.053239	0.945519	0.567094	0.0428006	0.0649926	4.31929e-08	7.45632e-07	0.180439	0.00083016	0.00123647	0.00412442	0.0641562	0.141842	0.0438577	0.474286	0.023513	0.0539896	0.0985642	0.113825	0.0260598	0.032418	0.0150368	0.054213	0.717095	0.490358
NH-A astrocytes	0.0045275	0.797717	0.285118	0.667477	0.516793	0.164296	0.135335	0.464959	0.989244	0.100318	0.299801	0.818947	0.158851	0.501641	0.0502929	0.147917	0.00105735	3.16109e-05	2.0889e-05	0.130457	0.967758	0.260221	0.625241	0.314306	0.75918	0.00152825	2.64245e-08	0.0234362	0.00140517	0.026747	0.00219535	0.00118866	0.837138	0.376178	0.530185	0.0151714	0.212193	0.313025	0.236382	0.00932807	0.615464	0.00540256	0.00169275	0.124438	0.169876
Lung	0.0143268	0.283162	0.087249	0.0298984	0.0527641	0.0102378	0.948701	0.0113142	0.103363	0.00097549	0.010897	0.352424	0.953065	0.986437	0.284574	0.609808	0.565831	0.0530452	0.0715429	0.0141062	0.120337	0.563299	0.165331	0.0141994	0.313498	0.0238593	6.76341e-09	0.0892713	0.000286813	4.51566e-05	0.0055238	0.0687481	0.984818	0.30097	0.154225	0.437642	0.203179	0.393454	0.833327	1.23121e-06	0.815169	0.00193408	0.0577014	0.614115	0.846024
NHLF lung fibroblast primary cells	0.000123627	0.00329545	0.307312	0.0712118	0.19215	0.0191988	0.0835472	0.219514	0.264377	0.10638	0.0130711	0.694645	0.277157	0.663279	0.456113	0.702861	0.00832338	0.0118693	0.000249594	0.507823	0.199833	0.969012	0.716606	0.265906	0.0329626	0.000652444	3.16096e-05	0.930338	0.000753868	0.000510128	0.00541659	0.0359139	0.97724	0.187417	0.524172	0.209191	0.00791401	0.0471287	0.174917	0.00210829	0.909482	0.347142	0.0287036	0.0682646	0.176961
Aorta	8.61328e-07	0.111046	0.405455	0.74936	0.171342	0.0532455	0.348222	0.140326	0.126783	0.104875	0.0153282	0.677136	0.257809	0.386844	0.349646	0.754485	0.0114741	0.00204007	0.0026274	0.225928	0.329926	0.915224	0.626198	0.00659399	0.0779254	0.00313861	3.49066e-07	0.608055	0.00121283	0.0196883	2.51803e-06	0.00291026	0.639488	0.029872	0.16136	0.317645	0.0322848	0.170331	0.00931813	0.0265647	0.914278	0.0287694	0.0145973	0.147991	0.105202
Right atrium	0.000140004	0.0343337	0.105719	0.0596505	0.333437	0.242961	0.977357	0.217759	0.317426	0.00685681	0.0234979	0.758949	0.426737	0.697931	0.0689438	0.698085	0.220707	0.00235618	0.00229235	0.273431	0.840145	0.763692	0.628015	0.0513501	0.951905	0.00880944	3.3278e-09	0.0867588	2.46459e-05	2.18113e-05	0.000136156	5.64496e-06	0.0674361	0.0777357	0.313682	0.048411	0.043164	0.233794	0.0133086	9.51252e-05	0.042952	0.0336054	0.000868594	0.187647	0.179135
Left ventricle	0.000240102	0.0530476	0.177023	0.288354	0.180578	0.272156	0.699497	0.506859	0.0208204	0.00879967	0.0204726	0.35531	0.798919	0.994207	0.960576	0.245805	0.0275835	0.00059128	0.00611979	0.202707	0.250024	0.624014	0.41222	0.000905488	0.598586	0.0134813	1.92632e-07	0.0882248	0.000734278	0.000742389	0.000117097	0.000637071	0.857512	0.425892	0.0368722	0.127656	0.520926	0.874174	0.260546	0.00253763	0.444656	0.016316	0.0062982	0.177826	0.815256
Right ventricle	3.28767e-05	0.399165	0.336683	0.683889	0.14315	0.0527937	0.344479	0.0349171	0.254332	0.0396132	0.00643689	0.257915	0.0756009	0.119706	0.138499	0.336527	0.000867477	0.000147857	0.000107755	0.00621951	0.619124	0.635493	0.732505	0.0461746	0.725257	0.000297241	1.42255e-10	0.0189335	0.010991	0.0186471	0.00667223	0.000379929	0.849475	0.0412256	0.230551	0.109718	0.0232205	0.034988	0.0480881	0.000410949	0.166921	0.00110806	0.0892811	0.0296235	0.0766791
Muscle satellite cultured cells	0.00141289	0.289281	0.131964	0.819035	0.631729	0.138013	0.153804	0.158957	0.157783	0.0053453	0.0142937	0.188487	0.560079	0.782718	0.0626555	0.467483	0.00558481	0.00041176	0.00287894	0.0531232	0.823292	0.388518	0.347087	0.353598	0.599344	0.0266421	6.0901e-13	0.0460886	0.00135049	0.0592209	0.00219832	9.62659e-05	0.309628	0.00846654	0.359943	0.00639519	0.00684774	0.05353	0.0481614	0.00445339	0.943415	0.00220835	0.00372862	0.465877	0.475315
Psoas muscle	4.11744e-05	0.000126328	0.234802	0.124928	0.112193	0.00815021	0.775556	0.309176	0.275396	0.108465	0.0129516	0.239207	0.0898046	0.88682	0.933081	0.021901	0.00394983	0.0009748	0.00155351	2.55599e-05	0.0296517	0.812381	0.447451	0.999787	0.241856	0.000264064	5.2705e-10	0.0283139	0.000502887	0.0214426	0.0002238	0.0042914	0.737044	0.0871727	0.616748	0.112894	0.0639615	0.220463	0.0549279	0.0115453	0.529159	0.00406363	0.112291	0.00643088	0.0454214
Skeletal muscle	1.15573e-05	0.0895616	0.0752095	0.681795	0.514867	0.338558	0.113691	0.0496035	0.0341281	0.0121842	0.0256511	0.460393	0.14394	0.423394	0.0219206	0.0137308	0.000466372	3.09307e-05	8.85401e-05	0.00028279	0.996643	0.862941	0.205212	0.167124	0.125515	2.75649e-07	8.56706e-12	0.000286995	0.0269077	0.0128828	0.0118106	0.000133084	0.627257	0.0384231	0.038352	0.000811809	0.322026	0.453962	0.174981	0.224835	0.141432	0.0499421	0.00584684	0.318433	0.268799
HSMM skeletal muscle myoblasts cells	0.046902	0.940166	0.398467	0.627419	0.709659	0.0475687	0.0289035	0.407035	0.44115	0.56652	0.645958	0.951013	0.0859907	0.269705	0.537131	0.849922	0.129267	0.065308	0.0420066	0.906095	0.531896	0.336081	0.128325	0.0569867	0.0334796	0.487199	1.83823e-06	0.00896137	0.225669	0.312316	0.0587142	0.0184621	0.326522	0.274395	0.717292	0.0834145	0.827907	0.600776	0.888425	0.0968779	0.284791	0.000793647	0.0168407	0.00303871	0.0624357
HSMM cell derived skeletal muscle myotubes cells	0.00188291	0.27712	0.514736	0.876562	0.85961	0.319227	0.594854	0.327254	0.672316	0.247079	0.522684	0.724164	0.632305	0.247126	0.0330725	0.706047	0.105937	0.068588	0.0124904	0.0135547	0.249494	0.731756	0.659263	0.122545	0.493946	0.0135662	2.50264e-05	0.0610646	0.000247175	0.000288987	0.00899582	0.42234	0.137295	0.291824	0.629157	0.0493851	0.0938209	0.110647	0.042245	0.000506037	0.471101	0.00841476	0.0446045	0.117127	0.366281
Stomach smooth muscle	4.07962e-05	0.0375068	0.291153	0.309467	0.0561752	0.196528	0.369019	0.292711	0.302743	0.0280244	0.0812619	0.761048	0.131455	0.90691	0.384797	0.926111	0.00615135	5.17067e-05	0.00012861	0.0116481	0.340866	0.964612	0.240917	0.18578	0.504834	0.000156326	3.45008e-09	0.0046827	6.58234e-05	0.00968297	6.3229e-05	0.0178784	0.905871	0.0631977	0.839456	0.0615768	0.194132	0.539546	0.0110173	0.00241434	0.424974	0.00285644	9.09739e-05	0.0202548	0.0219998
Duodenum smooth muscle	0.000239077	0.27508	0.128802	0.478358	0.0542361	0.0337101	0.238608	0.407314	0.387002	0.0424926	0.0365257	0.447279	0.935041	0.908454	0.219188	0.45573	0.123919	0.000597159	0.00110397	0.0391578	0.84347	0.994464	0.768744	0.0335422	0.952162	0.0244464	2.46607e-06	0.252436	0.000140756	0.00478546	2.37654e-05	0.0280211	0.155684	0.026137	0.475702	0.00427402	0.157339	0.181347	0.0348932	0.0401105	0.906102	0.00109398	0.0347846	0.155241	0.377814
Colon smooth muscle	1.70728e-05	0.20197	0.137467	0.0565254	0.0600194	0.00942064	0.220759	0.340344	0.179192	0.00522526	0.0140196	0.880324	0.80341	0.569119	0.119531	0.818174	0.00045341	4.26513e-05	0.00413245	0.207594	0.0159055	0.264959	0.337204	0.227856	0.302403	0.00165397	4.32726e-11	0.00675304	0.000125355	0.00162944	8.59756e-06	0.000244546	0.805546	0.147054	0.795079	0.00700058	0.0163937	0.0316338	0.0179021	0.000448192	0.172797	0.00345553	0.0125864	0.00681274	0.00964982
Rectal smooth muscle	0.0110961	0.0929939	0.22472	0.867743	0.422615	0.0993368	0.0712858	0.0784268	0.179559	0.0983574	0.0508246	0.45346	0.298739	0.32249	0.304809	0.125681	0.0458603	0.00640396	0.000748047	0.318795	0.846437	0.00399247	0.937311	0.0610331	0.453159	0.192685	1.90591e-07	0.0184529	0.00243156	0.0143776	0.00991672	0.00129556	0.492436	0.486323	0.495546	0.796297	0.0725105	0.362921	0.233687	0.00964853	0.854466	0.00302686	0.00208278	0.980821	0.627928
Esophagus	0.000455166	0.135656	0.385651	0.212134	0.146027	0.0245083	0.894582	0.254028	0.0994241	0.0415897	0.0122442	0.267643	0.372363	0.817013	0.54366	0.869592	0.00442523	0.00125855	0.00568173	0.122655	0.171689	0.817326	0.969852	0.139056	0.459115	0.000634495	1.20427e-07	0.0102242	0.00606914	0.00577548	0.00159513	0.0162816	0.207951	0.0685783	0.101915	0.500288	0.0629178	0.273066	0.0760218	0.0190485	0.87161	0.171629	0.00827815	0.150572	0.544543
Gastric	0.00200997	0.041119	0.126978	0.608814	0.0049304	0.0819898	0.573174	0.617767	0.294242	0.811143	0.0651406	0.876122	0.395664	0.412458	0.460388	0.842275	0.091204	0.00988352	0.00697341	0.576626	0.276649	0.135217	0.279084	0.528495	0.825134	0.021129	0.000190783	0.0446488	0.0729643	0.280715	0.308028	0.0238621	0.0334429	0.16516	0.334258	0.278797	0.0790849	0.392225	0.0364351	0.306525	0.32669	0.129223	0.00870977	0.23814	0.280826
Stomach mucosa	0.00163644	0.0224739	0.256195	0.317158	0.258874	0.0590746	0.182074	0.0735948	0.0561028	0.0039033	0.0151114	0.649612	0.963891	0.591047	0.142759	0.299521	0.00177696	0.00524057	0.0276578	0.00795955	0.911952	0.636649	0.368493	0.0752939	0.276969	0.00245414	8.11602e-11	0.0667991	0.00327424	0.00382332	0.00982653	0.000714699	0.389635	0.213342	0.115291	0.00289887	0.0107065	0.0167602	0.0446797	0.0668762	0.517218	0.00169607	0.00311691	0.046552	0.0427555
Duodenum mucosa	0.00232295	0.00624383	0.216904	0.0964649	0.100163	0.164046	0.0502687	0.0639937	0.0235491	0.018758	0.0400037	0.162633	0.864087	0.696207	0.246099	0.682561	0.00381944	0.0026826	0.106132	0.0754482	0.397271	0.50384	0.958291	0.0945634	0.787243	0.0012982	2.80152e-10	0.0020945	0.00594244	0.00274565	0.00156542	0.122758	0.264806	0.198158	0.908317	0.000700937	0.0199878	0.0445728	0.00591552	0.088969	0.885235	0.0019721	0.0444641	0.210377	0.330919
Small intestine	0.000302877	0.0885966	0.716986	0.77857	0.0317491	0.00292594	0.0128183	0.0459511	0.0381192	0.00375376	0.000356253	0.614129	0.111106	0.287338	0.000934282	0.528707	0.0125324	0.00191549	0.00197376	0.20487	0.0219033	0.70661	0.963383	0.00516009	0.385039	0.0202029	9.526e-05	0.385021	5.77289e-05	0.00240723	0.000215259	0.00031922	0.415479	0.0664091	0.217865	0.167065	0.0859366	0.19815	0.0162592	0.000290171	0.143966	0.00514789	0.016642	0.886239	0.283544
Sigmoid colon	3.53032e-05	0.304893	0.334092	0.0818709	0.735522	0.0208756	0.11327	0.385919	0.00554891	0.0042966	0.00114237	0.898556	0.120847	0.956308	0.398882	0.748298	0.0127882	0.000889956	0.000278011	0.161066	0.737402	0.5494	0.472171	0.0713832	0.186856	0.00145105	5.01158e-08	0.0915425	0.00202003	0.00872303	0.00257482	0.0126456	0.240263	0.0975785	0.444681	0.0219681	0.0106678	0.0085677	0.101682	0.0219272	0.831227	0.012032	0.036751	0.0277002	0.00569538
Colonic mucosa	0.000278426	0.0188672	0.0214581	0.0180707	0.23616	0.0127775	0.00105389	0.0423449	0.0122294	0.00116732	0.00600205	0.484163	0.203388	0.52191	0.306283	0.766186	0.0237434	0.00043739	0.0014692	0.0547675	0.15084	0.691269	0.318949	0.000713022	0.065211	3.27369e-06	5.42588e-10	0.0025139	0.000496084	0.00143575	0.000563466	9.08585e-06	0.48488	0.350032	0.229351	0.118407	0.197574	0.288558	0.425008	0.0234538	0.496136	0.000123961	0.0919131	0.343003	0.237353
Rectal mucosa	0.00144124	0.296936	0.269898	0.241679	0.0157093	0.00158103	0.000267405	0.172547	0.0082484	0.00666909	0.043649	0.811644	0.213329	0.716579	0.166672	0.912234	0.0388975	0.0378409	0.0974803	0.0472121	0.828422	0.714797	0.649544	0.0837338	0.894865	0.113239	1.95779e-08	0.000817337	0.000114571	0.0005869	0.00851232	0.00363833	0.713363	0.0129339	0.118342	0.00397989	0.010905	0.0353945	0.238559	0.00506655	0.143022	0.00300652	0.0534808	0.0105977	0.0226428
Pancreas	0.00373409	0.431633	0.067421	0.219038	0.138377	0.101034	0.165816	0.824127	0.0700445	0.173006	0.0562698	0.953621	0.576433	0.326028	0.0463334	0.248937	0.258941	0.0772748	0.0867933	0.787992	0.926514	0.869209	0.113357	0.944166	0.270513	0.126642	5.15763e-05	0.166676	0.137178	0.516078	0.0261438	3.03385e-05	0.386097	0.36558	0.691177	0.122596	0.532681	0.894096	0.0302786	0.0578556	0.0930561	0.00779797	0.00560832	0.954736	0.37314
Pancreatic islets	1.77424e-08	0.0053256	0.803418	0.590861	0.703756	0.328249	0.791087	0.944745	0.387812	0.0262144	0.0107297	0.642005	0.00225792	0.610465	0.0270989	0.477635	0.000917427	3.88158e-06	2.4419e-08	0.00398651	0.133118	0.345187	0.134002	0.068198	0.0979943	5.45284e-05	2.69116e-07	0.18086	2.75499e-05	0.000868809	0.00341709	0.000496664	0.0326992	0.0507956	0.254491	0.599138	0.0607343	0.784749	0.0934257	0.0590625	0.00124532	0.15715	0.00099202	0.493143	0.478895
Liver	0.000380135	0.0653812	0.0180555	0.253282	0.0208117	0.0162452	0.0769076	0.0257671	0.035168	0.000496432	0.00178838	0.160014	0.412798	0.430381	0.0754364	0.210381	0.00087355	0.000116762	0.000657276	0.672291	0.534374	0.839043	0.94527	0.00671295	0.167938	0.00288753	1.04025e-09	0.00137924	1.57548e-05	0.000154979	0.00642389	7.6748e-06	0.180515	0.000103712	0.125949	3.50559e-05	4.73756e-07	3.97116e-06	4.77576e-05	1.23858e-05	0.232629	6.75431e-05	0.00110555	0.0165481	0.0105802
Adipose nuclei	0.000423234	0.055208	0.292364	0.28407	0.0674727	0.00607243	0.00864357	0.0501408	0.000766825	0.0119058	0.00235386	0.195676	0.434552	0.152136	0.00260108	0.57336	0.00047667	0.00212903	0.00216448	0.0312261	0.571184	0.141671	0.966458	0.431596	0.307963	4.80103e-05	1.14566e-11	3.40215e-13	4.54959e-08	1.69114e-06	4.38966e-06	9.00471e-09	0.273005	0.000374591	0.00139752	4.57886e-09	0.000843001	0.00525867	1.35482e-06	9.84457e-06	0.0457545	0.000543024	8.48615e-05	0.0022765	0.000759151
Adipose derived mesenchymal stem cell cultured cells	0.101242	0.604309	0.0312122	0.652482	0.539509	0.4845	0.0253431	0.21609	0.158905	0.144269	0.152997	0.785696	0.691699	0.327922	0.327265	0.99395	0.0742262	0.00084591	0.0371383	0.216716	0.929777	0.406914	0.622319	0.0191945	0.651313	0.197791	1.73719e-12	0.000823359	0.000104496	0.00374939	0.0101666	0.000379693	0.692595	0.0153278	0.221181	0.0970403	0.129353	0.427143	0.568059	0.000551012	0.792867	0.000518052	0.00245636	0.517175	0.554483
Mesenchymal stem cell derived adipocyte cultured cells	0.00266052	0.159578	0.0824563	0.650091	0.757294	0.329841	0.247037	0.755721	0.0942664	0.00496654	0.269253	0.857002	0.754319	0.893785	0.815833	0.454357	0.00988393	0.00372293	0.0100138	0.067437	0.605213	0.995136	0.379499	0.0194602	0.340352	0.0649138	9.3511e-13	0.000171293	0.000443206	0.00261959	0.0104084	0.00797066	0.822233	0.00966662	0.471286	4.25063e-05	0.160133	0.169209	0.077909	0.00200996	0.521661	0.00072803	0.00371277	0.374887	0.714558
Mesenchymal stem cell derived chondrocyte cultured cells	0.000147583	0.50764	0.127677	0.703796	0.234311	0.0775301	0.0636145	0.350153	0.0529963	0.0801027	0.0115586	0.0582784	0.428319	0.835172	0.222301	0.771342	0.00371725	0.0284701	0.00097382	0.0280943	0.595329	0.270946	0.711893	0.0462185	0.301015	0.00197429	2.89916e-13	2.02874e-05	3.30223e-05	0.00186421	0.000393101	7.38246e-05	0.257828	0.0166271	0.536904	0.00584157	0.077026	0.122113	0.10326	0.000216072	0.36643	0.00167891	0.000439823	9.21126e-07	4.0096e-05
Bone marrow derived cultured mesenchymal stem cells	0.00655672	0.495434	0.285925	0.171997	0.814891	0.364795	0.388314	0.182827	0.566098	0.0253296	0.0106455	0.869418	0.110832	0.676503	0.92319	0.707487	0.0187937	0.123754	0.00178167	0.063037	0.623319	0.488384	0.661507	0.0446684	0.711027	0.175631	2.44361e-10	0.00712076	0.000385817	0.00835073	0.000699124	0.000247774	0.943173	0.240715	0.32163	0.114953	0.038915	0.0852221	0.0814338	4.20158e-05	0.475172	0.00111996	0.00259709	0.34775	0.0854582
Osteoblast primary cells	0.00118989	0.260867	0.396712	0.839691	0.495442	0.163658	0.0359999	0.260633	0.018885	0.0138937	0.014645	0.742114	0.966269	0.559557	0.110257	0.60211	0.00047415	4.77877e-05	4.23809e-05	0.0662079	0.94799	0.963056	0.755169	0.0159582	0.748521	0.287311	8.50494e-14	0.0347584	0.000151426	0.0023534	7.05443e-05	2.30635e-05	0.635535	0.17117	0.359187	0.0142381	0.094307	0.259087	0.078428	0.00514783	0.726159	0.000380494	0.00544383	0.0124021	0.0266588
NHDF-Ad adult dermal fibroblast primary cells	0.116006	0.61109	0.312475	0.667558	0.516804	0.138618	0.98409	0.294509	0.848338	0.518806	0.566366	0.350724	0.0588156	0.789156	0.638279	0.200694	0.0120695	0.166897	0.289861	0.168879	0.0154342	0.229714	0.519083	0.00105415	0.862785	0.29548	9.77113e-08	2.32534e-05	0.0336684	0.260607	0.00448584	0.00363914	0.542935	0.0491937	0.499215	0.0641501	0.188688	0.322172	0.791519	0.152344	0.670706	0.0786705	0.0243915	0.0108467	0.00563048
NHEK-epidermal keratinocyteprimary cells	0.00685865	0.00991283	0.017821	0.0151479	0.0569591	0.0847415	0.420351	0.611137	0.280878	0.022722	0.0560947	0.709757	0.789446	0.249774	0.00726233	0.383134	0.0198141	0.00346691	0.00371013	0.0585694	0.263851	0.174296	0.283717	0.142156	0.0914654	0.0375303	8.09325e-06	0.0475052	0.000579365	0.0354358	0.00298938	4.30961e-05	0.963311	0.224188	0.290849	0.074013	0.0792278	0.0152334	0.637599	0.000511497	0.0897095	0.00106907	0.0144807	0.460744	0.511047
Breast myoepithelial primary cells	0.00201237	0.031056	0.118203	0.471988	0.531505	0.3746	0.100898	0.119229	0.248775	0.011974	0.0579543	0.423516	0.245419	0.856372	0.0273463	0.599991	0.00145863	3.84719e-05	0.0137746	0.0618944	0.494625	0.797409	0.462974	0.0670726	0.503949	0.000800539	6.21698e-14	0.039531	0.00187328	0.0240125	0.00713498	0.00483498	0.636835	0.00407648	0.751659	0.00233131	0.351316	0.464007	0.0438432	0.0241621	0.912211	0.00788768	7.69186e-05	0.197682	0.119924
Breast variant human mammary epithelial cells (vHMEC)	0.000418585	0.0741634	0.446713	0.520765	0.139688	0.190312	0.190132	0.0937676	0.265237	0.0193293	0.0176531	0.986928	0.760202	0.648247	0.00134146	0.384619	0.00179302	2.64384e-07	0.020064	0.0619433	0.179148	0.840938	0.183836	0.0164483	0.0752817	0.000134447	6.77225e-13	0.201923	0.00875956	0.0452993	0.00289915	0.00112401	0.111088	0.14606	0.706343	0.125181	0.797172	0.640781	0.0752492	0.00738638	0.281376	0.00085972	0.00431099	0.424893	0.400487
HMEC mammary epithelial primary cells	0.000102811	0.0172366	0.446785	0.550179	0.427461	0.400859	0.786101	0.0932025	0.994789	0.00711503	0.0831827	0.442226	0.171995	0.706525	0.84245	0.637269	0.0647052	0.0380079	0.0370492	0.718413	0.749597	0.60292	0.883334	0.452546	0.147389	0.00428682	7.80821e-05	0.363155	0.0545454	0.786143	0.0025141	0.0160238	0.283876	0.14949	0.349659	0.102535	0.568266	0.831128	0.220386	0.0707379	0.0520448	0.0192241	0.546516	0.0169204	0.141606
Ovary	9.57455e-05	0.0839277	0.883369	0.802496	0.151596	0.049137	0.391966	0.506494	0.182284	0.253067	0.033087	0.353673	0.214086	0.408308	0.447283	0.518869	0.0221386	0.0230541	0.0332301	0.94358	0.133628	0.506304	0.281035	0.967239	0.282503	0.0574485	6.88585e-09	0.0906494	0.0232466	0.104859	0.000217973	2.33873e-05	0.365341	0.0166272	0.203091	0.0206516	0.0256235	0.0568522	0.000852951	0.000133802	0.124032	0.000441436	0.103379	0.038497	0.0136331
